# Supplementary material for: 89Zr-pembrolizumab biodistribution is influenced by PD-1-mediated uptake in lymphoid organs
Source: PubMed Central journal article supplement — J Immunother Cancer. 2020 Oct 5;8(2):e000938. doi: 10.1136/jitc-2020-000938 (PMC7537332; doi:10.1136/jitc-2020-000938), 2020-10-05
Supplement: jitc-2020-000938supp001.pdf [file jitc-2020-000938supp001.pdf]

## SUPPLEMENTARY MATERIAL

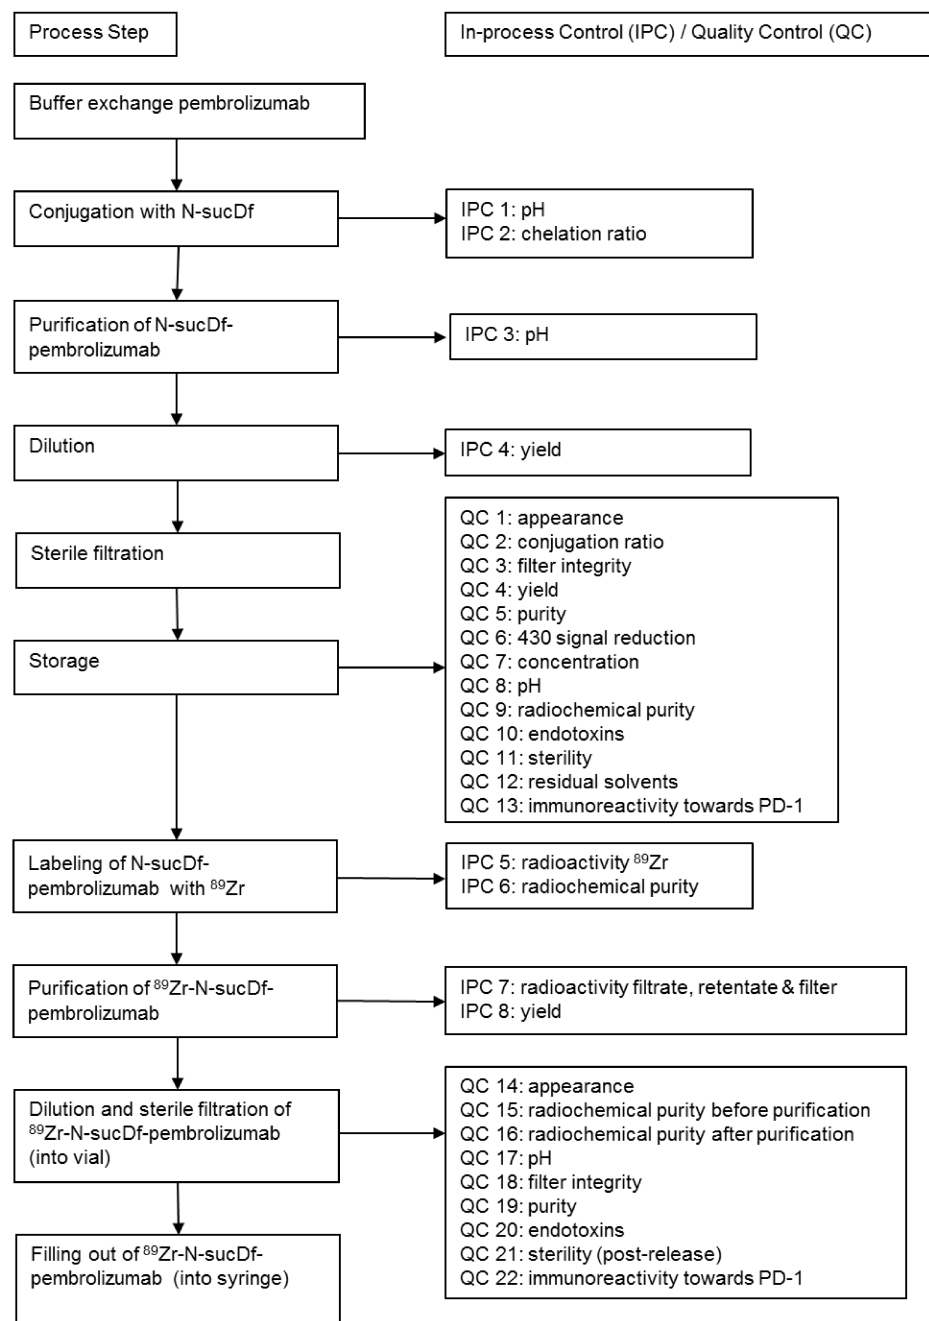

**Figure S1:** Flow chart of the manufacturing process of the conjugated N-sucDf-pembrolizumab and the  $^{89}\text{Zr}$ -pembrolizumab formulation and filling process, including in-process control (IPC) and release quality control (QC) steps.

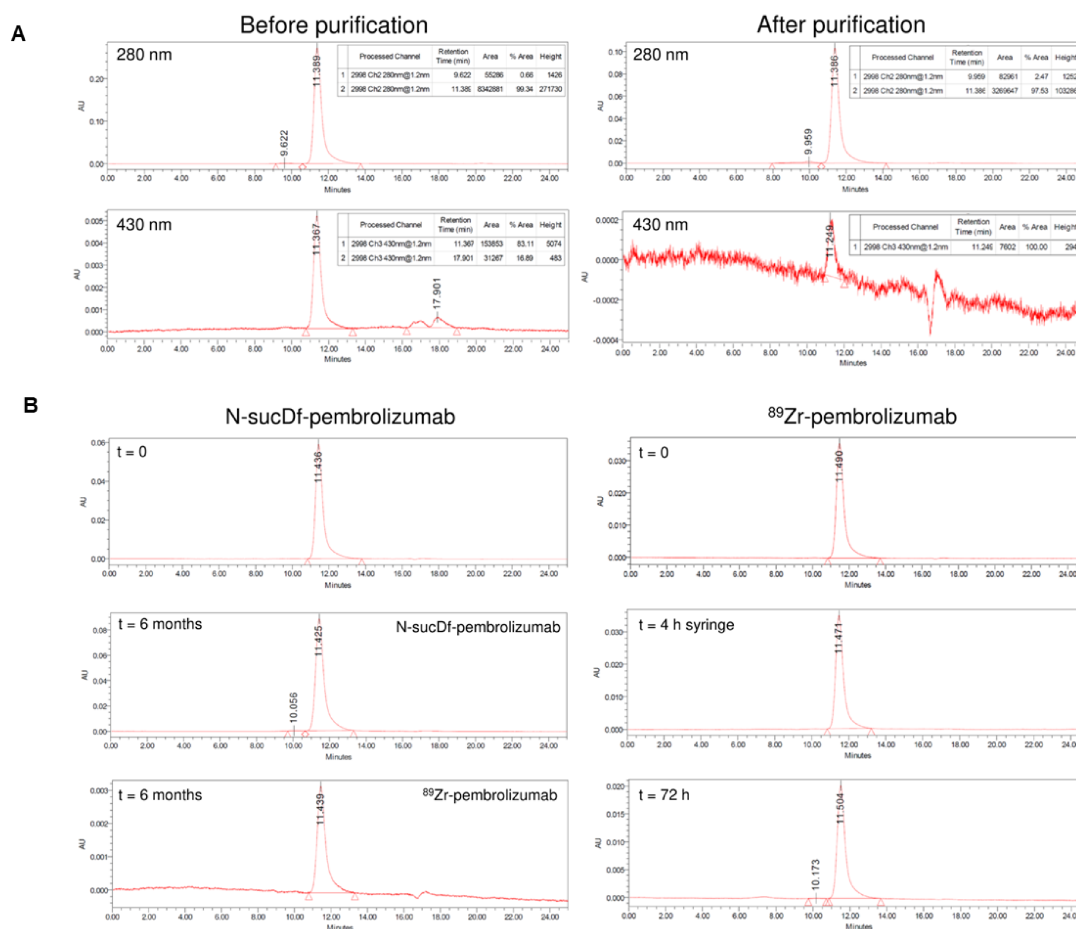

**Figure S2:** Representative SE-HPLC chromatograms for quality control of N-sucDf-pembrolizumab and  $^{89}\text{Zr}$ -pembrolizumab. **A)** SE-HPLC chromatograms for determination of the final number of TFP-N-sucDf ligands per antibody (chelation ratio). Left panel shows chromatograms before purification, right panel after purification. **B)** SE-HPLC chromatograms for determination of stability. Left panels shows chromatograms for stability of N-sucDf-pembrolizumab and  $^{89}\text{Zr}$ -pembrolizumab at  $t = 0$  and  $t = 6$  months. Right panel shows chromatograms for stability of  $^{89}\text{Zr}$ -pembrolizumab at  $t = 0$ ,  $t = 4$  h and  $t = 72$  h. Abbreviations: SE-HPLC: size exclusion high-performance liquid chromatography.

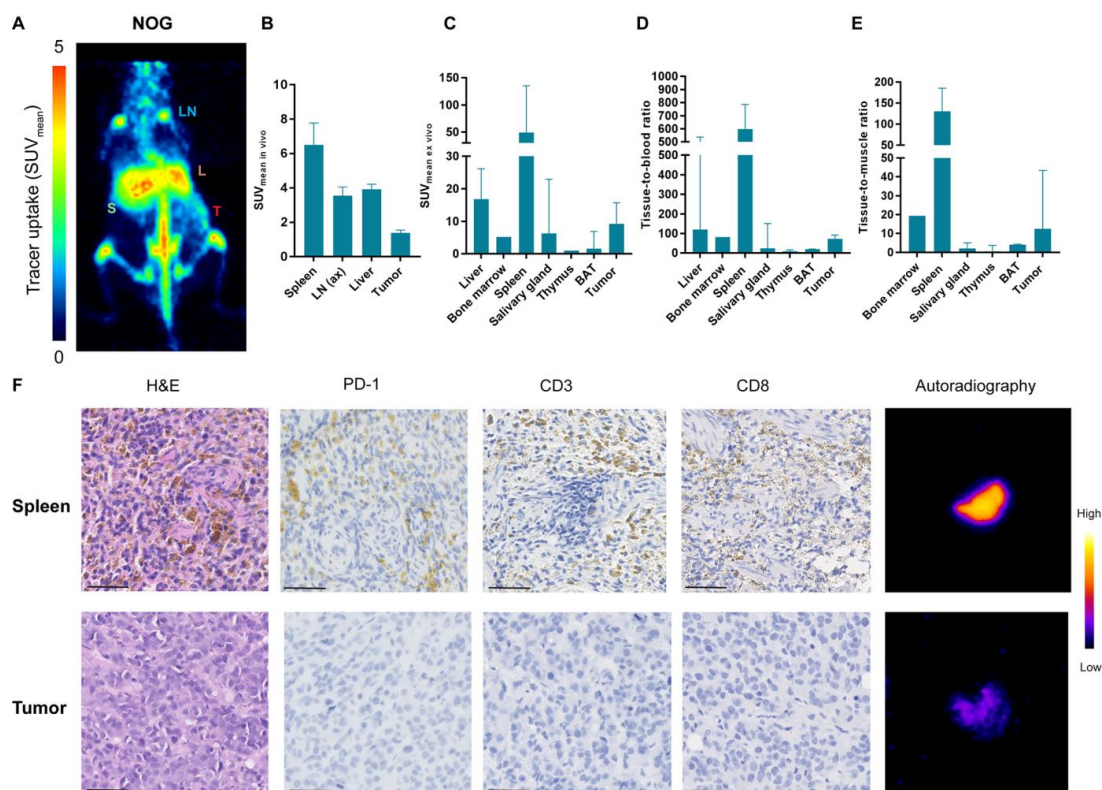

**Figure S3:** *In vivo* PET imaging and *ex vivo* biodistribution of  $^{89}\text{Zr}$ -pembrolizumab in immunodeficient NOG mice. Mice were xenografted with A375M tumor cells and received tracer injection at day 0. PET imaging performed on day 7 pi. **A)** *In vivo* PET example (maximum intensity projection) at day 7 pi showing uptake in tumor (T) uptake, lymph nodes (LN), liver (L) and spleen (S). **B)** *In vivo* uptake of  $^{89}\text{Zr}$ -pembrolizumab in liver, spleen, lymph nodes (axillary), liver and tumor, at day 7 pi. Uptake is expressed as  $\text{SUV}_{\text{mean}}$ . **C)** *Ex vivo* biodistribution of  $^{89}\text{Zr}$ -pembrolizumab in NOG mice. Uptake is expressed as mean radioactivity per gram tissue, adjusted for total body weight ( $\text{SUV}_{\text{mean ex vivo}}$ ). **D)** *Ex vivo* biodistribution of  $^{89}\text{Zr}$ -pembrolizumab in NOG mice, expressed as tumor-to-blood ratio. **E)** *Ex vivo* biodistribution of  $^{89}\text{Zr}$ -pembrolizumab in NOG mice, expressed as tumor-to-muscle ratio. Data expressed as median  $\pm$  IQR;  $*p \leq 0.05$ . Abbreviations: MLN: mesenteric lymph

nodes; BAT: brown adipose tissue. **F)** IHC analysis and autoradiography of spleen and tumor tissue of NOG mice. Formalin-fixed and paraffin embedded (FFPE) tissue blocks were cut into slices of 4  $\mu\text{M}$  and stained for PD-1, CD3 and CD8 (40x). Hematoxylin & eosin (H&E) staining served to analyze tissue viability and morphology (40x). For autoradiography slices were exposed to a phosphor imaging screen for 72 hours and were then scanned using a Cyclone phosphor imager. Scalebar: 50  $\mu\text{m}$ .

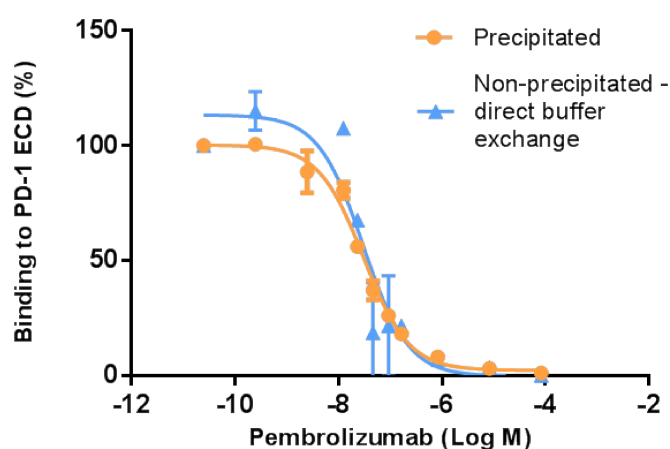

**Figure S4:** Immunoreactivity assays of different batches of N-sucDf-pembrolizumab. N-sucDf-pembrolizumab, which was precipitated during conjugation (orange line) and N-sucDf-pembrolizumab which was not precipitated during conjugation, by changing pH directly in one step (blue line).

**Table S1: GMP manufacturing of N-sucDf-pembrolizumab and <sup>89</sup>Zr-pembrolizumab.**

Batch 1, 2, and 3 fulfill release criteria. In addition, stability data are shown for N-sucDf-pembrolizumab stored at -80°C for 6 months. All release specifications are still met.

| Test                                         | Specification             | Batch 1     | Batch 2     | Batch 3     | Batch 1<br>6 M at -80°C  |
|----------------------------------------------|---------------------------|-------------|-------------|-------------|--------------------------|
| <b>N-sucDf-pembrolizumab</b>                 |                           |             |             |             |                          |
| Appearance                                   | Colorless to light yellow | Colorless   | Colorless   | Colorless   | Colorless                |
| Conjugation ratio of N-SucDf-pembrolizumab   | 1.5-2.5                   | 1.66        | 1.55        | 1.69        | Not applicable           |
| Filter integrity                             | ≤ 20%                     | 12%         | 12%         | 14%         | Not applicable           |
| Yield                                        | > 50%                     | 87.2%       | 77.8%       | 78.8%       | Not applicable           |
| Impurities of N-SucDf-pembrolizumab          | ≤ 5%                      | < 5%        | < 5%        | < 5%        | < 5%                     |
| Signal reduction at 430 nm                   | > 40% reduced             | 87.4%       | 79.6%       | 74.8%       | ND according to protocol |
| Concentration                                | 9.0-11.0 mg/mL            | 10.13 mg/mL | 9.65 mg/mL  | 10.13 mg/mL | 10.83 mg/mL              |
| pH                                           | pH 4.0 - 6.0              | 4.7         | 4.9         | 5.0         | 4.66                     |
| Radiochemical purity (test labeling)         | > 95%                     | 99.3%       | 99.4%       | 99.3%       | 99.7%                    |
| Endotoxins                                   | ≤ 2.5 EU/mL               | < 2.5 EU/mL | < 2.5 EU/ml | < 2.5 EU/mL | ND according to protocol |
| Sterility                                    | Sterile                   | Sterile     | Sterile     | Sterile     | ND according to protocol |
| Residual solvents (ACN)                      | < 410 ppm                 | < 100 ppm   | < 100 ppm   | < 100 ppm   | ND according to protocol |
| <b><sup>89</sup>Zr-pembrolizumab</b>         |                           |             |             |             |                          |
| Appearance                                   | Colorless to light yellow | Colorless   | Colorless   | Colorless   | Colorless                |
| Radiochemical purity pre-purification        | ≥ 70%                     | 97.4%       | 97.8%       | 95.5%       | 97.6%                    |
| Radiochemical purity post-purification       | ≥ 95%                     | 99.3%       | 99.4%       | 99.3%       | 99.7%                    |
| pH                                           | pH 5.0-8.0                | 5.65        | 5.18        | 5.66        | 6.1                      |
| Filter integrity                             | ≤ 20%                     | 14%         | 14%         | 12%         | 15%                      |
| Impurities of <sup>89</sup> Zr-pembrolizumab | ≤ 10%                     | < 10%       | < 10%       | < 10%       | < 10%                    |
| Concentration                                | For information only      | 0.262 mg/mL | 0.094 mg/mL | 0.133 mg/mL | 0.200 mg/mL              |
| Bacterial endotoxins                         | ≤ 2.5 EU/mL               | 0.450 EU/mL | 0.412 EU/mL | 0.532 EU/mL | ND according to protocol |
| Sterility                                    | Sterile                   | Sterile     | Sterile     | Sterile     | ND according to protocol |
| Immunoreactivity towards PD-1                | > 70%                     | 202%        | 88%         | 114%        | 231%                     |

Abbreviations: ACN: acetonitrile; ND: not determined; ppm: parts per million

**Table S2: Stability data of <sup>89</sup>Zr-pembrolizumab.** Stability data are shown for two batches

<sup>89</sup>Zr-pembrolizumab stored 4 h at room temperature (RT) or 168 h at 2-8°C in the vial. All release specifications are still met.

| Test                                         | Specification             | Batch 1         |                |                   | Batch 2         |                |                   |
|----------------------------------------------|---------------------------|-----------------|----------------|-------------------|-----------------|----------------|-------------------|
|                                              |                           | Original result | 4 h RT syringe | 168 h 2-8 °C vial | Original result | 4 h RT syringe | 168 h 2-8 °C vial |
| Appearance                                   | Colorless to light yellow | Colorless       | Colorless      | Colorless         | Colorless       | Colorless      | Colorless         |
| pH                                           | pH 4.0 - 6.0              | 5.65            | 6.16           | 6.33              | 5.40            | 5.75           | 6.14              |
| Radiochemical purity (post-purification)     | > 95%                     | 99.3%           | 98.6%          | 97.1%             | 99.6%           | 99.1%          | 98.2%             |
| Impurities of <sup>89</sup> Zr-pembrolizumab | ≤ 10%                     | ≤ 10%           | ≤ 10%          | ≤ 10%             | ≤ 10%           | ≤ 10%          | ≤ 10%             |

**Table S3: *Ex vivo* biodistribution of  $^{89}\text{Zr}$ -pembrolizumab in humanized NOG mice and control NOG mice.** Tracer uptake in each organ is expressed as percentage of the injected dose per gram tissue (%ID/g), and as the mean radioactivity per gram tissue, adjusted for total body weight (SUVmean *ex vivo*).

| Tissue          | NOG   |      |       |                             |      |       | huNOG |      |       |                             |      |      | huNOG block |      |      |                             |     |      | huNOG IgG <sub>4</sub> |      |      |                             |     |      |
|-----------------|-------|------|-------|-----------------------------|------|-------|-------|------|-------|-----------------------------|------|------|-------------|------|------|-----------------------------|-----|------|------------------------|------|------|-----------------------------|-----|------|
|                 | %ID/g |      |       | SUV <sub>mean ex vivo</sub> |      |       | %ID/g |      |       | SUV <sub>mean ex vivo</sub> |      |      | %ID/g       |      |      | SUV <sub>mean ex vivo</sub> |     |      | %ID/g                  |      |      | SUV <sub>mean ex vivo</sub> |     |      |
|                 | Med   | Q1   | Q3    | Med                         | Q1   | Q3    | Med   | Q1   | Q3    | Med                         | Q1   | Q3   | Med         | Q1   | Q3   | Med                         | Q1  | Q3   | Med                    | Q1   | Q3   | Med                         | Q1  | Q3   |
| Blood           | 0.3   | 0.2  | 1.4   | 0.2                         | 0.1  | 0.3   | 0.2   | 0.2  | 7.1   | 0.1                         | 0.0  | 1.8  | 9.2         | 5.5  | 35.3 | 2.2                         | 1.4 | 7.4  | 1.8                    | 0.5  | 13.7 | 0.5                         | 0.2 | 4.3  |
| Heart           | 11.9  | 5.2  | 14.4  | 2.5                         | 1.0  | 3.2   | 2.7   | 2.6  | 4.3   | 0.6                         | 0.6  | 1.1  | 3.1         | 2.2  | 5.6  | 0.8                         | 0.5 | 1.2  | 2.9                    | 2.2  | 5.3  | 0.8                         | 0.5 | 1.7  |
| Lung            | 9.9   | 4.2  | 26.6  | 2.2                         | 0.8  | 5.6   | 2.2   | 1.8  | 3.9   | 0.5                         | 0.4  | 1    | 5.9         | 3.0  | 15.0 | 1.5                         | 0.8 | 3.2  | 2.1                    | 2.0  | 6.9  | 0.5                         | 0.5 | 2.2  |
| Liver           | 77.2  | 25.4 | 122.6 | 16.9                        | 5.1  | 26.2  | 25.5  | 14.6 | 39.4  | 6.0                         | 3.4  | 9.9  | 10.7        | 8.4  | 13.5 | 2.6                         | 2.1 | 2.9  | 21.2                   | 13.4 | 27.4 | 4.9                         | 3.9 | 7.1  |
| Kidney          | 22.2  | 18.8 | 24.4  | 4.5                         | 3.7  | 5.6   | 5.1   | 4.5  | 9.1   | 1.2                         | 1.1  | 2.3  | 5.4         | 4.2  | 11.4 | 1.3                         | 1.1 | 2.4  | 9.4                    | 6.5  | 23.7 | 2.4                         | 1.5 | 7.3  |
| Stomach         | 7.0   | 3.4  | 8.7   | 1.5                         | 0.7  | 2.0   | 2.4   | 2.2  | 4.3   | 0.6                         | 0.5  | 1.1  | 2.2         | 1.6  | 3.4  | 0.6                         | 0.4 | 0.7  | 1.7                    | 1.3  | 3.6  | 0.4                         | 0.3 | 1.1  |
| Pancreas        | 4.3   | 2.2  | 12.9  | 1.0                         | 0.5  | 2.7   | 3.1   | 2.4  | 6.2   | 0.7                         | 0.6  | 1.55 | 2.3         | 1.6  | 3.2  | 0.6                         | 0.4 | 0.7  | 2.0                    | 1.2  | 5.0  | 0.6                         | 0.3 | 1.3  |
| Small intestine | 33.4  | 17.7 | 53.3  | 7.0                         | 3.4  | 12.2  | 11.4  | 8.1  | 22.9  | 2.7                         | 1.9  | 5.7  | 6.6         | 3.1  | 8.9  | 1.6                         | 0.8 | 1.9  | 6.3                    | 4.5  | 15.8 | 1.5                         | 1.3 | 4.2  |
| Colon           | 5.0   | 1.2  | 11.6  | 1.0                         | 0.2  | 2.6   | 2.1   | 1.9  | 2.9   | 0.5                         | 0.4  | 0.8  | 2.9         | 1.3  | 5.0  | 0.7                         | 0.3 | 1.2  | 2.7                    | 1.8  | 4.2  | 0.8                         | 0.5 | 1.1  |
| Muscle          | 6.8   | 2.6  | 22.3  | 1.5                         | 0.5  | 4.7   | 2.8   | 2.0  | 4.3   | 0.7                         | 0.45 | 1.1  | 1.5         | 1.1  | 2.6  | 0.4                         | 0.3 | 0.6  | 2.4                    | 1.6  | 3.2  | 0.7                         | 0.4 | 0.9  |
| Brain           | 0.2   | 0.1  | 14.7  | 0.0                         | 0.0  | 3.1   | 0.1   | 0.1  | 1.2   | 0                           | 0    | 0.4  | 0.2         | 0.1  | 0.3  | 0.0                         | 0   | 0.1  | 0.15                   | 0.1  | 0.4  | 0.1                         | 0.0 | 0.1  |
| Bone            | 25.6  | 14.9 | 86.7  | 4.7                         | 3.1  | 20.1  | 15.2  | 10.1 | 28.8  | 3.6                         | 2.4  | 7.25 | 6.5         | 4.4  | 9.3  | 1.6                         | 1.1 | 2.0  | 12.7                   | 12.7 | 14.8 | 3.9                         | 2.9 | 4.0  |
| Bone marrow     | 28.4  | 28.4 | 28.4  | 5.2                         | 5.2  | 5.2   | 61.9  | 25.5 | 130.2 | 14.5                        | 6.1  | 32.8 | 29.9        | 5.3  | 58.1 | 7.1                         | 1.3 | 12.4 | 32.3                   | 31.5 | 33   | 8.8                         | 7.6 | 10.0 |
| Spleen          | 272.5 | 78.5 | 584.3 | 49.6                        | 16.6 | 135.6 | 130.3 | 66.5 | 269.5 | 30.5                        | 15.8 | 67.7 | 22.4        | 17.4 | 30.6 | 5.1                         | 4.3 | 7.0  | 59.8                   | 26.5 | 82.2 | 13.9                        | 7.1 | 21.4 |
| MLN             | -     | -    | -     | -                           | -    | -     | 87.2  | 35.3 | 101.1 | 20.4                        | 8.0  | 25.2 | 18.8        | 9.6  | 19.6 | 4.1                         | 2.5 | 4.6  | 10.0                   | 4.9  | 17.2 | 2.3                         | 1.4 | 4.4  |
| Salivary gland  | 29.1  | 12.1 | 108.7 | 6.3                         | 2.5  | 23.0  | 11.5  | 8.9  | 18.3  | 2.8                         | 2.1  | 4.6  | 5.7         | 5.0  | 7.8  | 1.4                         | 1.2 | 1.9  | 7.6                    | 5.1  | 10.2 | 2.1                         | 1.2 | 2.9  |
| Thymus          | 4.9   | 4.2  | 5.6   | 1.0                         | 1.0  | 1.0   | 5.3   | 4.6  | 8.6   | 1.3                         | 1.1  | 2.1  | 2.7         | 2.2  | 3.5  | 0.6                         | 0.5 | 0.8  | 2.3                    | 1.5  | 4.2  | 0.5                         | 0.4 | 1.1  |
| BAT             | 7.6   | 6.4  | 29.9  | 1.6                         | 1.2  | 6.9   | 1.7   | 1.5  | 1.8   | 0.4                         | 0.4  | 0.4  | 1.8         | 1.3  | 2.5  | 0.5                         | 0.3 | 0.5  | 1.5                    | 1.2  | 1.8  | 0.4                         | 0.3 | 0.5  |
| Tumor           | 42.5  | 22.6 | 72.6  | 9.3                         | 4.5  | 15.7  | 21.6  | 13.5 | 35.5  | 5.1                         | 3.3  | 8.9  | 18.5        | 10.2 | 33.4 | 4.2                         | 2.5 | 7.7  | 12.7                   | 11.5 | 15.8 | 3.5                         | 2.7 | 4.4  |
